# Supplementary material for: Promoter effect of Pd species on Mn oxide catalysts supported on rare-earth-iron mixed oxide
Source: Royal Society of Chemistry journal article supplement (doi:10.1039/c6cy01462c), 2016-01-01
Supplement: c6cy01462c1.pdf [file c6cy01462c1.pdf]

*Hosokawa et al.*

Promoter Effect of Pd Species toward Mn Oxide Catalyst on  
Rare-Earth-Iron Mixed Oxide

## Supporting Information

# Promoter Effect of Pd Species toward Mn Oxide Catalyst on Rare-Earth–Iron Mixed Oxide

Saburo Hosokawa,<sup>ab\*</sup> Ryohei Tada,<sup>b</sup> Takuya Shibano,<sup>b</sup> Shogo Matsumoto,<sup>b</sup> Kentaro

Teramura<sup>ab</sup> and Tsunehiro Tanaka<sup>ab\*</sup>

<sup>a</sup> Elements Strategy Initiative for Catalysts & Batteries (ESICB), Kyoto University, 1-30

Goryo-Ohara, Nishikyo-ku, Kyoto 615-8245, Japan

<sup>b</sup> Department of Molecular Engineering, Graduate School of Engineering, Kyoto

University, Kyotodaigaku Katsura, Nishikyo-ku, Kyoto 615-8510, Japan

Promoter Effect of Pd Species toward Mn Oxide Catalyst on  
Rare-Earth-Iron Mixed Oxide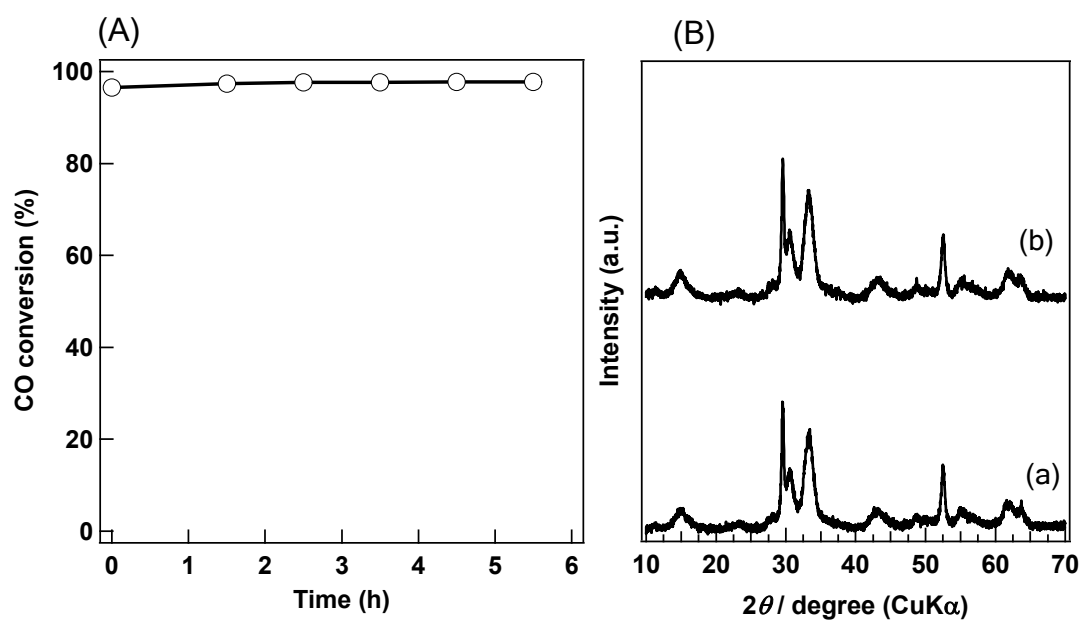

**Fig. S1** (A) Durability test at 200 °C for CO oxidation over 1.0 wt% Pd/Mn-*h*-YbFeO<sub>3</sub>(ST). (B) XRD patterns of 1.0 wt% Pd/Mn-*h*-YbFeO<sub>3</sub>(ST) before CO oxidation (a) and after durability test (b). No change was observed in the XRD patterns of catalysts before and after CO oxidation.

Promoter Effect of Pd Species toward Mn Oxide Catalyst on  
Rare-Earth-Iron Mixed Oxide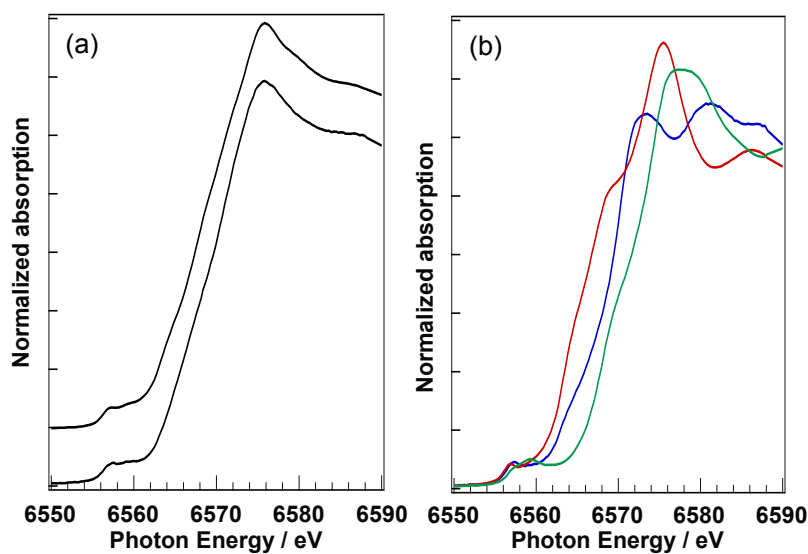

**Fig. S2** Linear curve fitting of Mn K-edge XANES spectra of Mn-*h*-YbFeO<sub>3</sub>(ST).

(a) Solid line shows the experimental data. Broken line represents the fitting data obtained by using XANES spectra of MnO<sub>2</sub>, Mn<sub>3</sub>O<sub>4</sub> and Mn-*h*-YbFeO<sub>3</sub>(PC) in a molar ratio of 32%, 39% and 29%. (b) Mn K-edge XANES spectra of standard samples are shown. Green line, red line and blue line are MnO<sub>2</sub>, Mn<sub>3</sub>O<sub>4</sub> and Mn-*h*-YbFeO<sub>3</sub>(PC), respectively.

Promoter Effect of Pd Species toward Mn Oxide Catalyst on  
Rare-Earth-Iron Mixed Oxide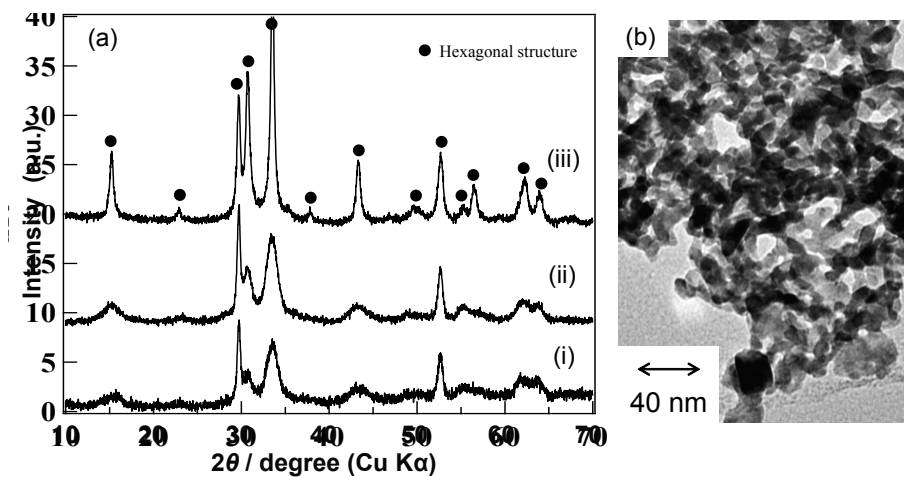

**Fig. S3** XRD pattern and TEM image of Mn-*h*-YbFeO<sub>3</sub> sample.

(a) XRD patterns of various catalysts. (i) Mn-*h*-YbFeO<sub>3</sub>(ST), (ii) 1.0 wt% Pd/Mn-*h*-YbFeO<sub>3</sub>(ST), (iii) Mn-*h*-YbFeO<sub>3</sub>(PC). (b) TEM image of Mn-*h*-YbFeO<sub>3</sub>(PC).

Promoter Effect of Pd Species toward Mn Oxide Catalyst on  
Rare-Earth-Iron Mixed Oxide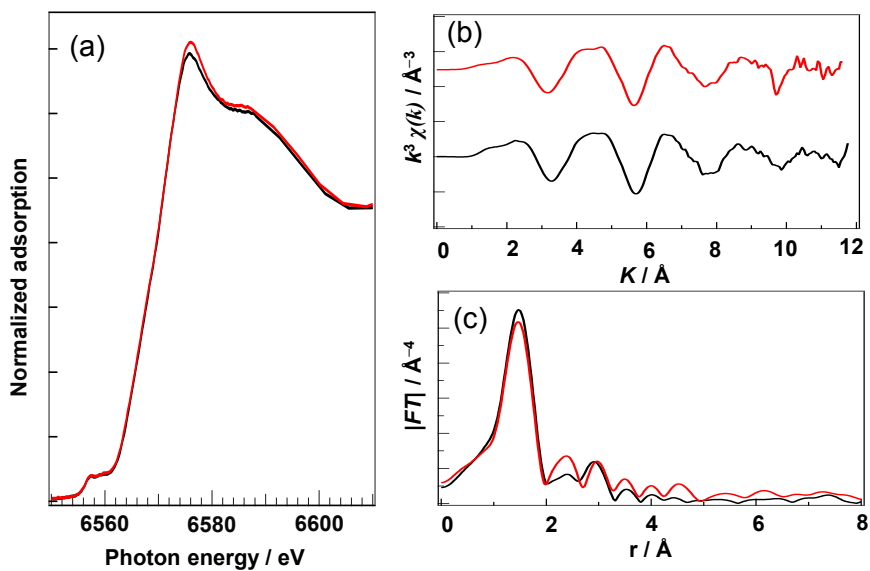

**Fig. S4** Mn K-edge XAFS spectra of Mn-*h*-YbFeO<sub>3</sub>(ST) and 1.0 wt% Pd/Mn-*h*-YbFeO<sub>3</sub>(ST). (a) XANES spectra, (b) EXAFS oscillations and (c) Fourier transform spectra of EXAFS of Mn-*h*-YbFeO<sub>3</sub>(ST) (black) and 1.0 wt% Pd/Mn-*h*-YbFeO<sub>3</sub>(ST) (red).

Promoter Effect of Pd Species toward Mn Oxide Catalyst on  
Rare-Earth-Iron Mixed Oxide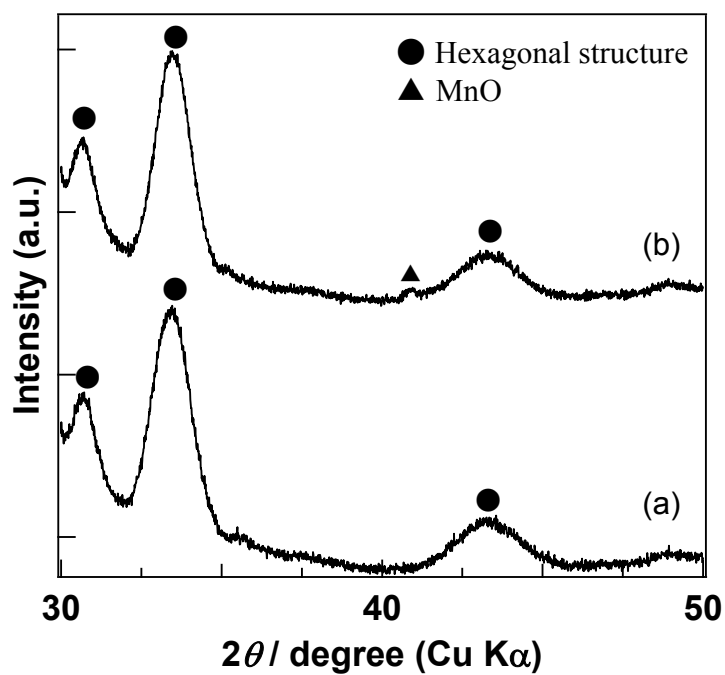

**Fig. S5** XRD patterns of the  $\text{Mn-}h\text{-YbFeO}_3(\text{ST})$ . (a) shows the sample before reduction, and (b) the sample reduced at  $500^\circ\text{C}$ .

Promoter Effect of Pd Species toward Mn Oxide Catalyst on  
Rare-Earth-Iron Mixed Oxide

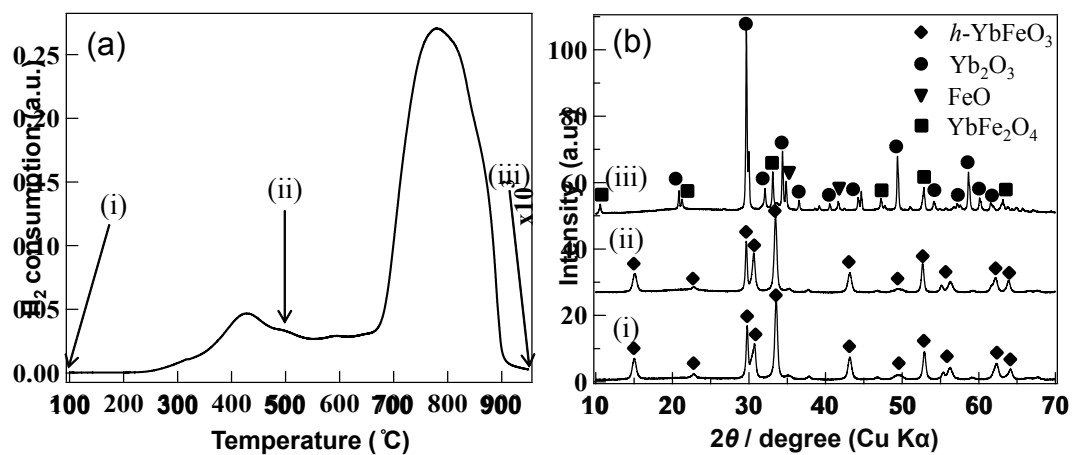

**Fig. S6** H<sub>2</sub>-TPR profile and XRD patterns of the reduced *h*-YbFeO<sub>3</sub>(ST). **(a)** H<sub>2</sub>-TPR profile of *h*-YbFeO<sub>3</sub>(ST) without Mn-modification. **(b)** XRD patterns of *h*-YbFeO<sub>3</sub>(ST). **(i)** shows the sample before reduction, **(ii)** the sample reduced at 500 °C, and **(iii)** the sample reduced at 950 °C.

Promoter Effect of Pd Species toward Mn Oxide Catalyst on  
Rare-Earth-Iron Mixed Oxide

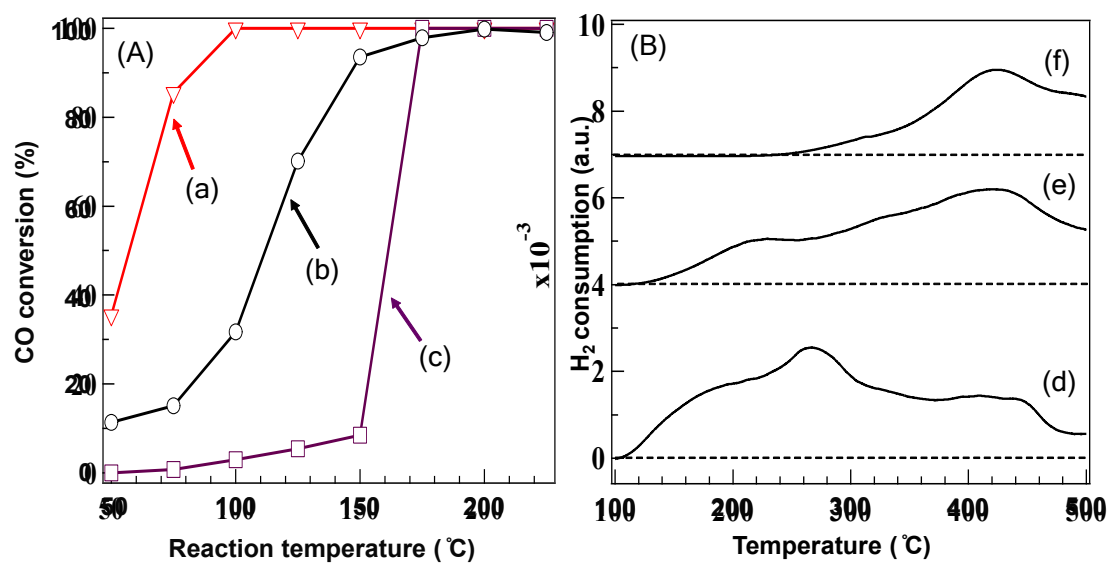

**Fig. S7** (A) CO oxidation over 1 wt % Pd/Mn-*h*-YbFeO<sub>3</sub> catalysts. (a) Pd catalyst supported on Mn-*h*-YbFeO<sub>3</sub>(ST) obtained by calcination temperature at 500 °C, (b) Pd catalyst supported on Mn-*h*-YbFeO<sub>3</sub>(ST) obtained by calcination temperature at 800 °C, and (c) 1 wt % Pd/Mn-*h*-YbFeO<sub>3</sub>(PC). (B) H<sub>2</sub>-TPR profiles of Mn-*h*-YbFeO<sub>3</sub> samples. (d) Mn-*h*-YbFeO<sub>3</sub>(ST) obtained by calcination temperature at 500 °C, (e) Mn-*h*-YbFeO<sub>3</sub>(ST) obtained by calcination temperature at 800 °C, and (f) Mn-*h*-YbFeO<sub>3</sub>(PC).
